# Supplementary material for: Adaptation and Validation of a French Version of the Vaccination Attitudes Examination (VAX) Scale
Source: MDPI journal article supplement (doi:10.3390/vaccines11051001), 2023-05-19
Supplement: s1 [file s1]

## Supplementary Data

Table. Descriptive characteristic of the VAX total score by gender and age categories for the total sample (n=450).

|                       | Vax total score            |
|-----------------------|----------------------------|
|                       | Means $\pm$ SD [min – max] |
| <i>Sexe</i>           |                            |
| Female                | 28.6 $\pm$ 10.3 [13-58]    |
| Man                   | 32.6 $\pm$ 11.3[12-60]     |
| <i>Age, years old</i> |                            |
| 18-24                 | 30.78 $\pm$ 10.45 [14-56]  |
| 25-34                 | 29.3 $\pm$ 9.65 [12-59]    |
| 35-44                 | 31.77 $\pm$ 11.6 [13-56]   |
| 45-54                 | 31.85 $\pm$ 13.39 [15-60]  |
| 55-64                 | 33.08 $\pm$ 14.07 [15-60]  |
| 65-74                 | 32.72 $\pm$ 14.43 [19-60]  |
| 75-81                 | 27.25 $\pm$ 9.33 [19-49]   |

*Note.* Data are presented as mean $\pm$  standard deviations [range]; VAX = Vaccination Attitudes Examination scale ;
